# Supplementary material for: TGF-β receptor inhibitor LY2109761 enhances the radiosensitivity of gastric cancer by inactivating the TGF-β/SMAD4 signaling pathway
Source: publisher site journal article supplement (doi:10.18632/aging.102329), 2019-10-19
Supplement: Supplementary file [file aging-v11i20-102329-supplementary-material-SD1.pdf]

## SUPPLEMENTARY FIGURES

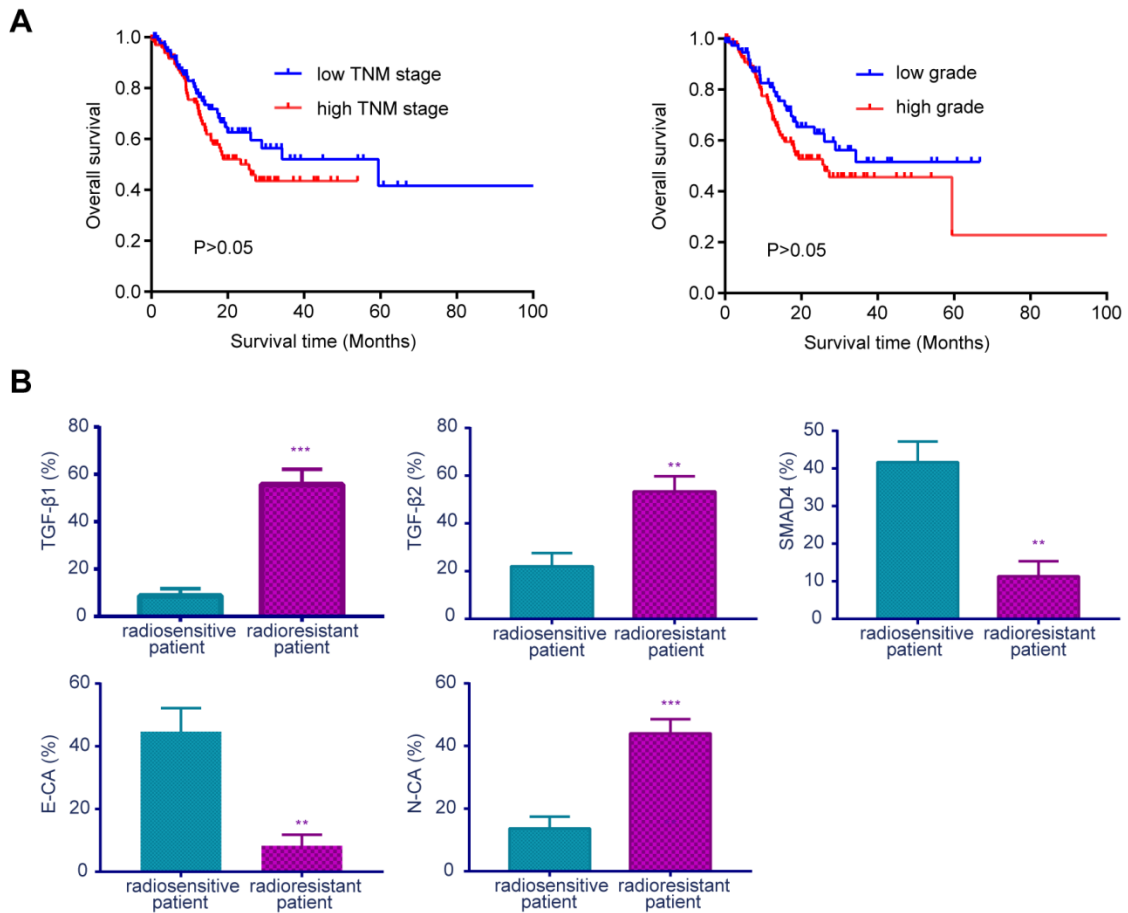

**Supplementary Figure 1.** (A) The relationship between the TNM stage and grade with the overall survival in GC patients. (B) The immunohistochemistry staining index of related gene in radiosensitive and radioresistant GC patients.

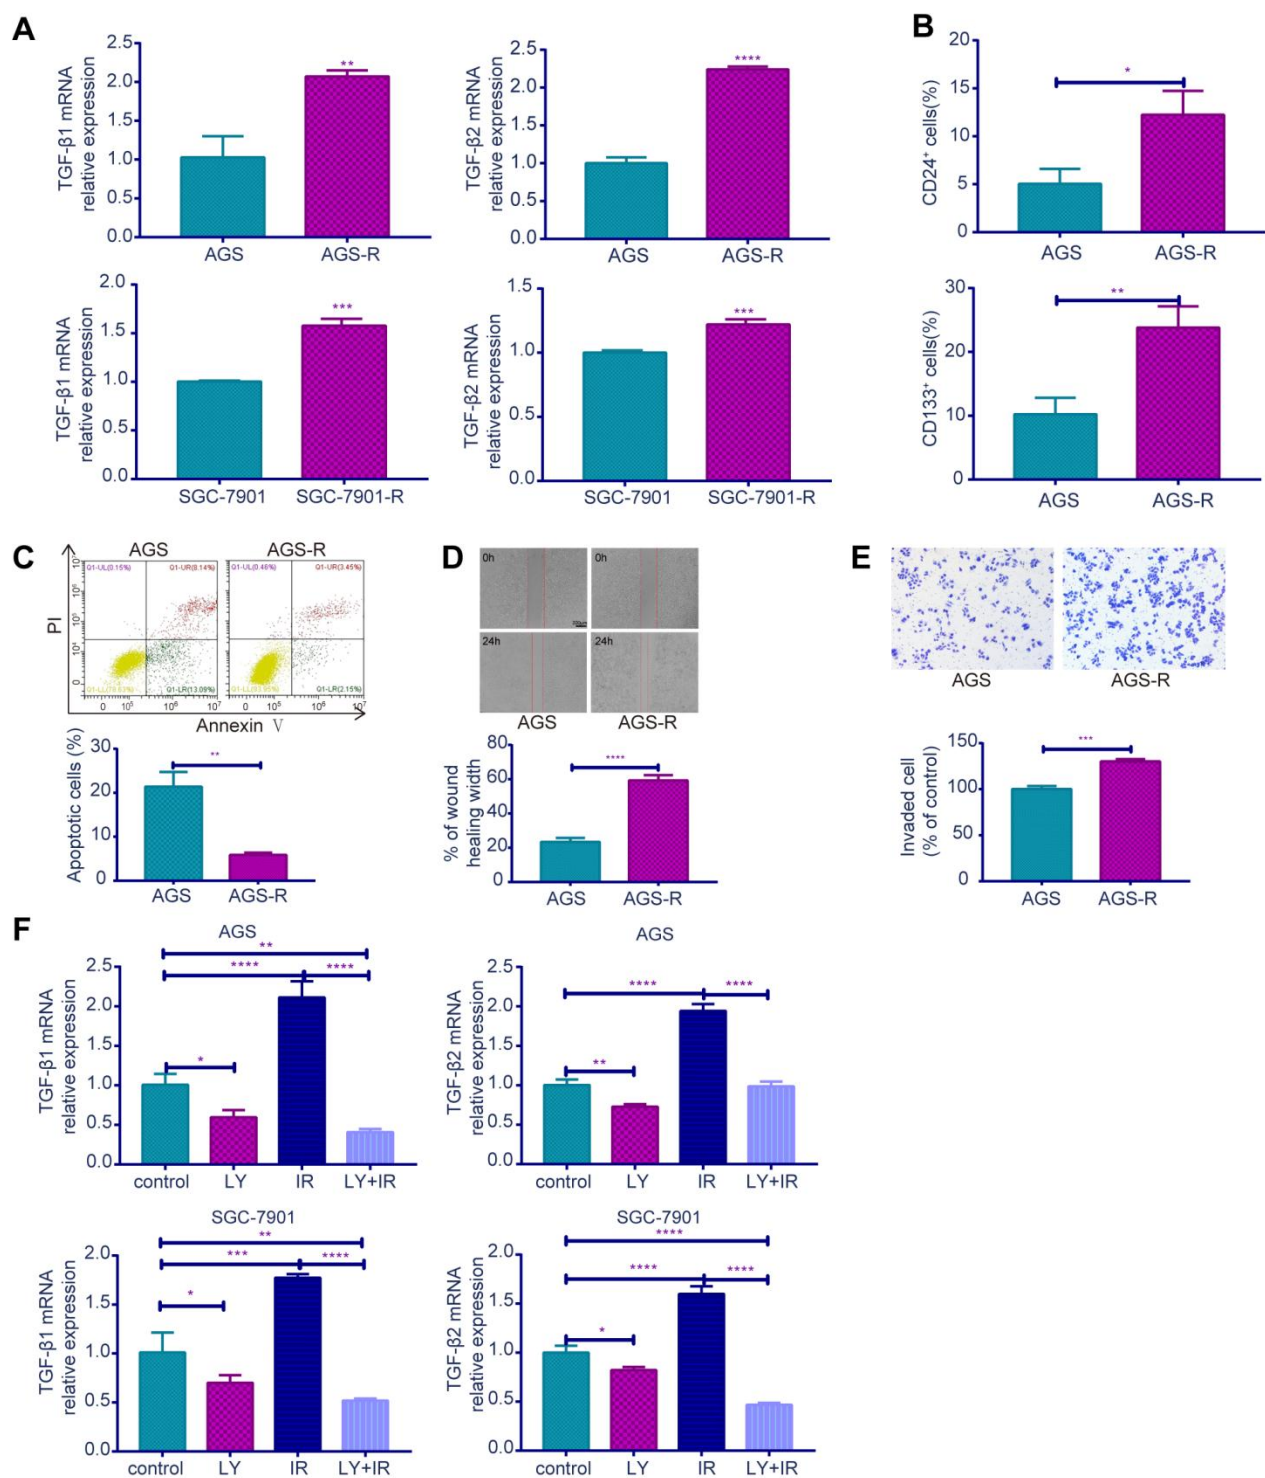

**Supplementary Figure 2.** (A) The TGF-β1 and TGF-β2 expressions in parental GC cells and radioresistant GC cells detected by PCR analysis. (B) the expressions of the CSC markers CD24 and CD133 between AGS and AGS-R cells. (C) Flow cytometry analysis: cell apoptosis between AGS and AGS-R cells after irradiation treatment. (D) Cell migration assay: captured images of wound healing assay of AGS and AGS-R cells, columns indicated the percentage of wound healing width of AGS and AGS-R cells. (E) Cell invasion assay: captured images of transwell assay of AGS and AGS-R cells, columns indicated the invaded cell percentage of AGS and AGS-R cells. (F) LY inhibited the TGF-β1 and TGF-β2 expressions in irradiated GC cells.

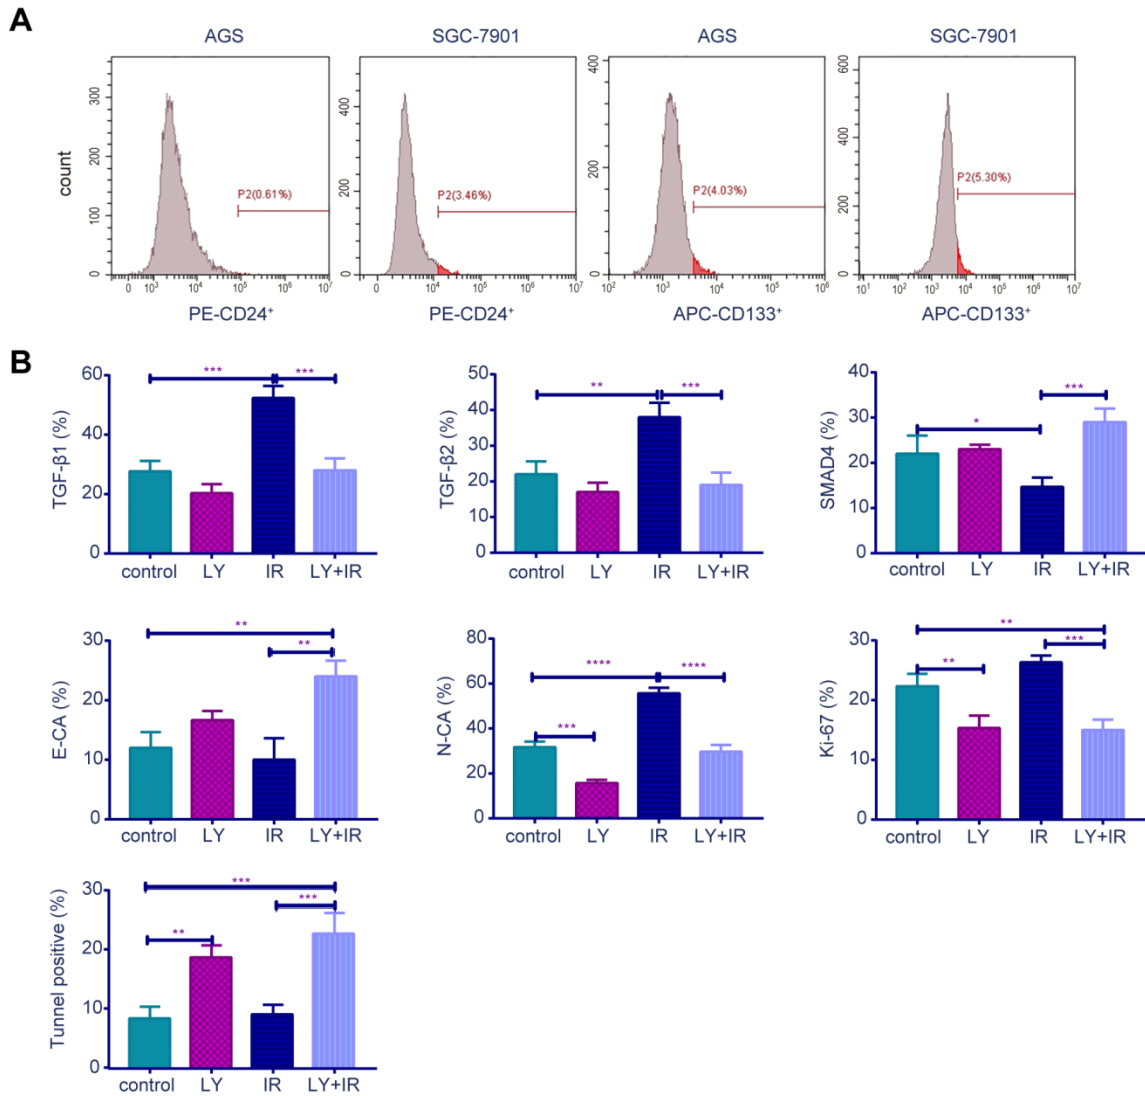

**Supplementary Figure 3.** (A) the representative results of the expressions of putative stem cell markers CD24 and CD133 in GC cells (isotype controls). (B) The immunohistochemistry staining index of related gene in GC xenografts.
